# Supplementary material
Source: PubMed Central journal article supplement (PMC4113070)
Supplement: supp_db14-0276_DB140276SupplementaryData.pdf [file supp_db14-0276_DB140276SupplementaryData.pdf]

SUPPLEMENTARY DATA

**Supplementary Table 1.** Primer sequences for real time PCR.

| <b>Gene</b>   | <b>Forward Primer</b>   | <b>Reverse Primer</b>   |
|---------------|-------------------------|-------------------------|
| <i>FAS</i>    | CGGGCGGGAAGGGTGTGAC     | CACGCTGGCCTGCAGCTTCT    |
| <i>DGAT1</i>  | CCGGGAGTTCTACCGGGACTGG  | CCATCCACCTGCTGCTGCC     |
| <i>PPARA</i>  | CGTGGCTGCTATCATTGCTGTGG | CGTCCGGGTGGTTGCTCTGC    |
| <i>PEPCK</i>  | TCATGACGCGGATGGGCACG    | CGTCAGCTCCGGGTTGCAGG    |
| <i>TNFA</i>   | TCGAACCCCAAGTGACAAGCCT  | GCCATTGGCCAGGAGGGCAT    |
| <i>TLR4</i>   | GCTTCTCCGTTTTCCAGAACTGC | TGGAGAGGTGGCTTAGGCTCTGA |
| <i>LPIN1</i>  | TCGGATGAGGCCATGGAGCTG   | TGAGGGTAAATCACGGTCGGGG  |
| <i>ACCI</i>   | CACACCAGGCCGGATGCAGG    | ACGCCTCAGCCGCCAGTAGA    |
| <i>MCP1</i>   | GCACTTCTGTGCCTGCTGCTCA  | GCAGCAAGTGACGGGGGCAT    |
| <i>SCD1</i>   | TCCCGGCATCCGAGAGCCAA    | CCTGGAGGGAGGCGCTGTGA    |
| <i>SREBP1</i> | CCGCTCCTCCATCAATGACA    | GCTGTGTTGCAGAAAGCGAA    |
| <i>SREBP2</i> | ACTTCGCCAGGAGAACATGG    | ACCAGACTGCCTAGGTCGAT    |
| <i>APOB</i>   | ACAGGCGTCAGCCACTTGC     | TCCTCTTGGCGTCCAGGGTGT   |
| <i>PEMT</i>   | GGGTCCCCTACCTGGCCTG     | TTGGGCTGGCTCAGCATGGC    |
| <i>NLRP3</i>  | GCGAGCCATGCAGGCCAAGA    | GGAGACGCCCCAGCTCTCCA    |
| <i>CASP1</i>  | TGGCAGGGACGCTGGGACTT    | AGCTGGGTTGCTCCTGCATTGCC |
| <i>SERCA2</i> | GCCCTGGCCACTCACGACAA    | CCCACGCAGCCAACGAAGGT    |
| <i>IL1B</i>   | GCTCTCCACCTCCAGGGACAGG  | TGAGGCCCAAGGCCACAGGT    |
| <i>CD11B</i>  | ACGCGCAGGCAGACGAAGAC    | TCAGGCGCAGCACAAATGGGG   |
| <i>CD68</i>   | AGGCTCCAGGCTGCTCAGCT    | ATGGACCGGTCCTGGGGCA     |
| <i>ARG1</i>   | TCAGCCTGGTGCTGGGTGGA    | CAGGGTGGACGCTGGCATGG    |
| <i>PPARG</i>  | GGCGAGGGCGATCTTGACAGG   | GCTCTGCTCCTGCAGTGGGG    |
| <i>PPARD</i>  | TGGGGGACCACAGCATGCAC    | TCCAGCAGTGAGGGTGGCGA    |
| <i>CCR2</i>   | TTGACGTGAAGCAAATCGGG    | CCAGCATGTTGCCACAAAA     |
| <i>INOS</i>   | AAGACCAGGCTGTGTTGAG     | GGATTCTGCAGCTGAGTGGT    |
| <i>DGAT2</i>  | AAACTGGGCTGTGTGGCGCT    | GGCCCATGATGCCATGGGGG    |
| <i>GPAT1</i>  | GTGGATTTTGCACAGCCGTT    | AGAAAGTGGAGCAGACACCG    |
| <i>AGPAT1</i> | TTGTCTCCAACCACAGAGC     | AGTAGCTCACGCTTGGCAAT    |
| <i>AGPAT2</i> | GTCATCGTCTCCAACCACCA    | CGAGGTACATGATGAGGCC     |

SUPPLEMENTARY DATA

**Supplementary Table 2.** Liver fatty acid composition.

| Fatty Acid (%)*         | CON/CON    | CON/HF     | HF+IR/CON  | HF+IR/HF   | Diet Effects |           |      |
|-------------------------|------------|------------|------------|------------|--------------|-----------|------|
|                         |            |            |            |            | Maternal     | Post-wean | INT  |
| <i>Triglycerides</i>    |            |            |            |            |              |           |      |
| Saturated               | 28.6 ± 1.1 | 32.7 ± 0.5 | 28.5 ± 0.7 | 31.5 ± 1.1 | 0.58         | <0.005    | 0.63 |
| Mono-unsaturated        | 18.7 ± 0.1 | 39.8 ± 3.5 | 24.3 ± 2.1 | 41.9 ± 1.5 | 0.11         | <0.0001   | 0.44 |
| Poly-unsaturated        | 52.7 ± 1.1 | 27.6 ± 3.1 | 47.2 ± 2.5 | 26.7 ± 1.1 | 0.15         | <0.0001   | 0.29 |
| Essential               | 45.2 ± 0.9 | 22.5 ± 1.4 | 42.5 ± 1.9 | 23.5 ± 0.8 | 0.57         | <0.0001   | 0.20 |
| all n-6                 | 44.5 ± 0.2 | 26.1 ± 2.9 | 41.1 ± 1.9 | 25.4 ± 1.1 | 0.28         | <0.0001   | 0.46 |
| all n-3                 | 8.2 ± 1.3  | 1.5 ± 0.3  | 6.1 ± 0.8  | 1.2 ± 0.1  | 0.06         | <0.0001   | 0.13 |
| n-6:n-3                 | 5.7 ± 1.1  | 18.0 ± 1.4 | 7.3 ± 1.0  | 21.7 ± 2.5 | 0.28         | <0.0001   | 0.66 |
| <i>Diacylglycerides</i> |            |            |            |            |              |           |      |
| Saturated               | 33.9 ± 1.4 | 35.5 ± 1.8 | 30.7 ± 0.7 | 33.9 ± 0.8 | <0.05        | <0.05     | 0.49 |
| Mono-unsaturated        | 15.9 ± 0.9 | 32.7 ± 2.9 | 20.9 ± 1.6 | 33.6 ± 1.6 | 0.17         | <0.0001   | 0.35 |
| Poly-unsaturated        | 50.2 ± 0.6 | 31.8 ± 1.9 | 48.5 ± 2.0 | 32.5 ± 0.9 | 0.75         | <0.0001   | 0.46 |
| Essential               | 43.6 ± 0.6 | 26.0 ± 1.2 | 44.2 ± 1.9 | 27.3 ± 0.5 | 0.43         | <0.0001   | 0.76 |
| all n-6                 | 46.0 ± 0.3 | 31.1 ± 1.9 | 44.5 ± 1.6 | 31.7 ± 0.9 | 0.75         | <0.0001   | 0.46 |
| all n-3                 | 4.2 ± 0.7  | 0.7 ± 0.1  | 4.0 ± 0.4  | 0.8 ± 0.1  | 0.86         | <0.0001   | 0.70 |
| n-6:n-3                 | 12.0 ± 2.6 | 45.6 ± 8.8 | 11.6 ± 1.1 | 40.8 ± 3.3 | 0.60         | <0.0001   | 0.64 |
| <i>Phospholipids</i>    |            |            |            |            |              |           |      |
| Saturated               | 45.2 ± 0.1 | 44.9 ± 0.5 | 45.5 ± 0.4 | 44.1 ± 0.3 | 0.54         | 0.08      | 0.25 |
| Mono-unsaturated        | 5.1 ± 0.6  | 8.1 ± 0.8  | 4.9 ± 0.3  | 8.6 ± 0.5  | 0.80         | <0.0001   | 0.55 |
| Poly-unsaturated        | 49.7 ± 0.5 | 47.0 ± 0.6 | 49.7 ± 0.3 | 47.2 ± 0.3 | 0.76         | <0.0001   | 0.77 |
| Essential               | 22.2 ± 0.6 | 18.2 ± 0.7 | 20.5 ± 0.9 | 19.7 ± 0.6 | 0.89         | <0.01     | 0.06 |
| all n-6                 | 37.4 ± 0.4 | 41.1 ± 0.2 | 37.6 ± 0.4 | 41.9 ± 0.4 | 0.24         | <0.0001   | 0.48 |
| all n-3                 | 12.3 ± 0.2 | 5.9 ± 0.4  | 12.1 ± 0.6 | 5.3 ± 0.4  | 0.45         | <0.0001   | 0.72 |
| n-6:n-3                 | 3.0 ± 0.0  | 7.1 ± 0.5  | 3.1 ± 0.2  | 8.6 ± 1.2  | 0.46         | <0.0005   | 0.52 |

\* Measured in each lipid class by mass spec in a subset of offspring ( $n = 3 - 8$  per group).

**Supplementary Table 3.** Gene expression in isolated hepatocyte and hepatic macrophages from juvenile offspring.

| Expression*  | Hepatocytes |           | Hepatic Macrophages |            | Diet Effect |          |      |
|--------------|-------------|-----------|---------------------|------------|-------------|----------|------|
|              | CON/CON     | HF+IR/CON | CON/CON             | HF+IR/CON  | Cell        | Maternal | INT  |
| <i>CD45</i>  | 1.0 ± 0.5   | 0.5 ± 0.1 | 22.1 ± 1.1          | 33.1 ± 5.8 | <0.01       | 0.27     | 0.22 |
| <i>CD11B</i> | 1.0 ± 0.3   | 1.1 ± 0.3 | 4.4 ± 1.9           | 8.5 ± 1.6  | <0.05       | 0.22     | 0.19 |
| <i>CD68</i>  | 1.0 ± 0.4   | 0.9 ± 0.2 | 12.6 ± 1.7          | 25.5 ± 4.3 | <0.01       | 0.11     | 0.09 |

\* Gene expression measured in  $n = 2$  CON/CON and 3 HF+IR/CON sets of hepatocytes and hepatic macrophages from same animal.
